# Supplementary material
Source: PubMed Central journal article supplement (PMC5029161)
Supplement: ismej2015265x1.pdf [file ismej2015265x1.pdf]

**Supplementary Table 1. Reasons for Discontinuation**

|                                                                                                                                                                                                                                                                                                                                                                                                                                                                                                                                                                                | <b>CC-486 300 mg QD<br/>14 days/cycle<br/>(n=28)<br/>n (%)</b> | <b>CC-486 300 mg QD<br/>21 days/cycle<br/>(n=27)<br/>n (%)</b> | <b>Total<br/>(N=55)<br/>n (%)</b> |
|--------------------------------------------------------------------------------------------------------------------------------------------------------------------------------------------------------------------------------------------------------------------------------------------------------------------------------------------------------------------------------------------------------------------------------------------------------------------------------------------------------------------------------------------------------------------------------|----------------------------------------------------------------|----------------------------------------------------------------|-----------------------------------|
| <b>No response*</b>                                                                                                                                                                                                                                                                                                                                                                                                                                                                                                                                                            | 11 (39)                                                        | 6 (22)                                                         | 17 (31)                           |
| <b>Loss of response<sup>†</sup></b>                                                                                                                                                                                                                                                                                                                                                                                                                                                                                                                                            | 5 (18)                                                         | 4 (15)                                                         | 9 (16)                            |
| <b>Adverse event</b>                                                                                                                                                                                                                                                                                                                                                                                                                                                                                                                                                           | 3 (11)                                                         | 9 (33)                                                         | 12 (22)                           |
| <b>Allogeneic Hematopoietic Stem Cell Transplant (allo-HSCT)</b>                                                                                                                                                                                                                                                                                                                                                                                                                                                                                                               | 1 (4)                                                          | 3 (11)                                                         | 4 (7)                             |
| <b>Withdrew consent</b>                                                                                                                                                                                                                                                                                                                                                                                                                                                                                                                                                        | 1 (4)                                                          | 2 (7)                                                          | 3 (5)                             |
| <b>Other<sup>‡</sup></b>                                                                                                                                                                                                                                                                                                                                                                                                                                                                                                                                                       | 3 (11)                                                         | 1 (4)                                                          | 4 (7)                             |
| <b>Death</b>                                                                                                                                                                                                                                                                                                                                                                                                                                                                                                                                                                   | 2 (7)                                                          | 0                                                              | 2 (4)                             |
| <p>*Median number (range) of treatment cycles for patients with no response was 7 (3 - 11) cycles in the 14-day group, and 7 (1 - 9) cycles in the 21-day group.</p> <p><sup>†</sup>Median number (range) of treatment cycles for patients who lost response was 10 (7 - 24) cycles in the 14-day group, and 12.5 (11 - 14) cycles in the 21-day group.</p> <p><sup>‡</sup>1 patient had transportation difficulties, 1 patient discontinued due to investigator decision, and 2 patients completed 6 treatment cycles and did not enter the extension phase of the study.</p> |                                                                |                                                                |                                   |

**Supplementary Table 2. PK parameters for SC azacitidine on day 1 and 7 and for CC-486 on day 1 and the last dosing day (day 14 or 21) of cycle 1**

|                                                                                                                                                                                                                                                                                                                                                                                                                                                                                                                                                   |                      | <b>AUC<sub>∞</sub></b><br><b>(ng*h/mL)</b> | <b>C<sub>max</sub></b><br><b>(ng/mL)</b> | <b>T<sub>max</sub><sup>a</sup></b><br><b>(h)</b> | <b>t<sub>1/2</sub></b><br><b>(h)</b> | <b>CL/F</b><br><b>(L/h)</b> | <b>Vz/F</b><br><b>(L)</b> |
|---------------------------------------------------------------------------------------------------------------------------------------------------------------------------------------------------------------------------------------------------------------------------------------------------------------------------------------------------------------------------------------------------------------------------------------------------------------------------------------------------------------------------------------------------|----------------------|--------------------------------------------|------------------------------------------|--------------------------------------------------|--------------------------------------|-----------------------------|---------------------------|
| <b>Azacitidine SC 75 mg/m2</b>                                                                                                                                                                                                                                                                                                                                                                                                                                                                                                                    |                      |                                            |                                          |                                                  |                                      |                             |                           |
| Mean ±SD                                                                                                                                                                                                                                                                                                                                                                                                                                                                                                                                          |                      | 1011 ± 434                                 | 663 ± 269                                |                                                  | 1.5 ± 0.66                           | 177 ± 125                   | 381 ± 397                 |
| (%CV <sup>d</sup> )                                                                                                                                                                                                                                                                                                                                                                                                                                                                                                                               | Day 1                | (46)                                       | (48)                                     |                                                  | (50)                                 | (48)                        | (71)                      |
| Median                                                                                                                                                                                                                                                                                                                                                                                                                                                                                                                                            | (n=44 <sup>b</sup> ) | 964                                        | 602                                      | 0.50                                             | [1.41]                               | 159                         | 288                       |
| [min, max]                                                                                                                                                                                                                                                                                                                                                                                                                                                                                                                                        |                      | [195, 2927]                                | [114, 1310]                              | [0.23, 1.08]                                     | [0.53, 2.93]                         | [46, 894]                   | [92, 2718]                |
|                                                                                                                                                                                                                                                                                                                                                                                                                                                                                                                                                   |                      | 1021 ± 401                                 | 623 ± 250                                |                                                  | 1.9 ± 1.3                            | 168 ± 93                    | 460 ± 397                 |
|                                                                                                                                                                                                                                                                                                                                                                                                                                                                                                                                                   | Day 7                | (41)                                       | (48)                                     |                                                  | (68)                                 | (44)                        | (89)                      |
|                                                                                                                                                                                                                                                                                                                                                                                                                                                                                                                                                   | (n=44 <sup>b</sup> ) | 985                                        | 616                                      | 0.50                                             | 1.45                                 | 158                         | 298                       |
|                                                                                                                                                                                                                                                                                                                                                                                                                                                                                                                                                   |                      | [209, 2782]                                | [151, 1150]                              | [0.17, 1.00]                                     | [0.47, 5.18]                         | [48, 670]                   | [91, 1730]                |
| <b>CC-486 300 mg QD</b>                                                                                                                                                                                                                                                                                                                                                                                                                                                                                                                           |                      |                                            |                                          |                                                  |                                      |                             |                           |
| Mean ± SD                                                                                                                                                                                                                                                                                                                                                                                                                                                                                                                                         |                      | 193 ± 139                                  | 124 ± 84.9                               |                                                  | 0.53 ± 0.17                          | 2391 ± 2062                 | 1791 ± 1407               |
| (%CV)                                                                                                                                                                                                                                                                                                                                                                                                                                                                                                                                             | Day 1                | (72)                                       | (69)                                     |                                                  | (32)                                 | (86)                        | (79)                      |
| Median                                                                                                                                                                                                                                                                                                                                                                                                                                                                                                                                            | (n=25)               | 154 [28, 687]                              | 92 [24, 388]                             | 1.00 [0.47, 2.00]                                | 0.46 [0.34, 0.98]                    | 1948 [437, 10817]           | 1332 [355, 6202]          |
| [min, max]                                                                                                                                                                                                                                                                                                                                                                                                                                                                                                                                        |                      |                                            |                                          |                                                  |                                      |                             |                           |
|                                                                                                                                                                                                                                                                                                                                                                                                                                                                                                                                                   | Day                  | 182 ± 102 <sup>c</sup>                     | 98 ± 53                                  |                                                  | 0.62 ± 0.20 <sup>c</sup>             | 2221 ± 1435 <sup>c</sup>    | 2218 ± 2254 <sup>c</sup>  |
|                                                                                                                                                                                                                                                                                                                                                                                                                                                                                                                                                   | 14/21                | (56)                                       | (54)                                     |                                                  | (32)                                 | (65)                        | (102)                     |
|                                                                                                                                                                                                                                                                                                                                                                                                                                                                                                                                                   | (n=14)               | 135 [47, 419]                              | 75 [24, 206]                             | 1.23 [0.50, 3.50]                                | 0.57 [0.41, 0.99]                    | 2225 [716, 6427]            | 1423 [539, 9142]          |
| <p>%CV = coefficient of variation; AUC<sub>∞</sub> = the area under the concentration-time curve (AUC) from the time of dosing extrapolated to infinity; CL/F = apparent total clearance; C<sub>max</sub> = maximum observed concentration; t<sub>1/2</sub> = terminal half-life; T<sub>max</sub> = time to maximum concentration; Vz/F = apparent volume of distribution.</p> <p><sup>a</sup>Median [min, max].</p> <p><sup>b</sup>PK data were unavailable for 1 patient on Day 1 and 1 different patient on Day 7.</p> <p><sup>c</sup>n=13</p> |                      |                                            |                                          |                                                  |                                      |                             |                           |

<sup>d</sup>Geometric CV

---

**Supplementary Table 3. Patient demographics and disease characteristics by response**

| Characteristic                                             | Responders<br>(n=21) | Non-responders<br>(n=34) |
|------------------------------------------------------------|----------------------|--------------------------|
| <b>Age (years)</b> , median (range)                        | 71.0 (53 - 86)       | 72.0 (31 - 87)           |
| <b>RBC transfusion-dependent</b> ,* n (%)                  | 13 (62)              | 19 (56)                  |
| <b>Platelet transfusion-dependent</b> , <sup>†</sup> n (%) | 1 (5)                | 5 (15)                   |
| <b>Hematology</b> , median (range)                         |                      |                          |
| Hgb (g/dL)                                                 | 8.6 (6.0 - 11.6)     | 8.7 (6.4- 13.0)          |
| ANC (10 <sup>9</sup> /L)                                   | 1.4 (0.3 - 16.3)     | 1.7 (0 - 30.3)           |
| Platelets (10 <sup>9</sup> /L)                             | 144.0 (19.0 - 454.0) | 47.0 (6.0 - 564.0)       |
| <b>MDS WHO classification</b> , n (%)                      |                      |                          |
| RA/RARS <sup>‡</sup>                                       | 10 (48)              | 8 (24)                   |
| RCMD/RCMD-RS <sup>‡</sup>                                  | 5 (24)               | 12 (35)                  |
| RAEB-1                                                     | 2 (10)               | 6 (18)                   |
| RAEB-2                                                     | 1 <sup>§</sup> (5)   | 0                        |
| MDS-U                                                      | 1 (5)                | 5 (15)                   |
| Del(5q)                                                    | 1 (5)                | 1 (3)                    |
| Missing                                                    | 1 (5)                | 2 (6)                    |
| <b>IPSS risk classification</b> , n (%)                    |                      |                          |
| Low                                                        | 4(19)                | 10 (29)                  |
| Intermediate-1                                             | 17 (81)              | 24 (71)                  |
| <b>Cytogenetics</b> , n (%)                                |                      |                          |
| Normal/diploid                                             | 9 (43)               | 18 (53)                  |
| ≥ 1 Abnormality                                            | 10 (48)              | 9 (26)                   |
| Indeterminate                                              | 2 (10)               | 6 (18)                   |
| <b>Prior treatment</b> , n (%)                             |                      |                          |
| Erythropoiesis-stimulating agents                          | 10 (48)              | 16 (47)                  |
| WBC growth factors                                         | 4 (19)               | 5 (15)                   |
| Other                                                      | 5 (24)               | 8 (24)                   |
| None <sup>  </sup>                                         | 7 (33)               | 14 (41)                  |

\*Defined as receipt of ≥ 4 units of packed RBC within 56 days of the first dose of CC-486.

<sup>†</sup>Defined as receipt of ≥ 2 platelet transfusions within 56 days of the first dose of CC-486.

<sup>‡</sup>Because of the limited number of patients in the study, these classifications were grouped prospectively.

<sup>§</sup>Assessed as lower-risk MDS by the treating physician on the case report form.

<sup>||</sup>Other than transfusions.

RBC = red blood cell; Hgb = hemoglobin; ANC = absolute neutrophil count; RA = refractory anemia; RARS = RA with ringed sideroblasts; RCMD = refractory cytopenia with multilineage dysplasia; RCMD-RS = RCMD with ringed sideroblasts; RAEB = RA with excess blasts; MDS-U = myelodysplastic syndrome-unclassified; IPSS = International Prognostic Scoring System; WBC = white blood cell.

**Supplementary Table 4. Hematologic response by IPSS-R score**

| Parameter                                                                                                                                                                                                                                                                                                                                                                                                                                                                                                                                                                                                                                                                                                                                                                                                                                                                                                                                                                                                                                                                                                                                                                                                                                                         | IPSS-R Score*<br>n Responders/N Evaluable (%) |                      |              |
|-------------------------------------------------------------------------------------------------------------------------------------------------------------------------------------------------------------------------------------------------------------------------------------------------------------------------------------------------------------------------------------------------------------------------------------------------------------------------------------------------------------------------------------------------------------------------------------------------------------------------------------------------------------------------------------------------------------------------------------------------------------------------------------------------------------------------------------------------------------------------------------------------------------------------------------------------------------------------------------------------------------------------------------------------------------------------------------------------------------------------------------------------------------------------------------------------------------------------------------------------------------------|-----------------------------------------------|----------------------|--------------|
|                                                                                                                                                                                                                                                                                                                                                                                                                                                                                                                                                                                                                                                                                                                                                                                                                                                                                                                                                                                                                                                                                                                                                                                                                                                                   | Low <sup>†</sup><br>n=25                      | Intermediate<br>n=14 | High<br>n=15 |
| <b>Overall Response (CR, PR, any HI, TI)<sup>‡</sup></b>                                                                                                                                                                                                                                                                                                                                                                                                                                                                                                                                                                                                                                                                                                                                                                                                                                                                                                                                                                                                                                                                                                                                                                                                          | 11/25 (44)                                    | 5/14 (36)            | 5/15 (33)    |
| <b>CR<sup>§</sup></b>                                                                                                                                                                                                                                                                                                                                                                                                                                                                                                                                                                                                                                                                                                                                                                                                                                                                                                                                                                                                                                                                                                                                                                                                                                             | 0/0                                           | 0/3                  | 1/9 (11)     |
| <b>PR</b>                                                                                                                                                                                                                                                                                                                                                                                                                                                                                                                                                                                                                                                                                                                                                                                                                                                                                                                                                                                                                                                                                                                                                                                                                                                         | 0/0                                           | 0/2                  | 0/5          |
| <b>Any HI</b>                                                                                                                                                                                                                                                                                                                                                                                                                                                                                                                                                                                                                                                                                                                                                                                                                                                                                                                                                                                                                                                                                                                                                                                                                                                     | 9/25 (36)                                     | 5/14 (36)            | 4/15 (27)    |
| HI-E                                                                                                                                                                                                                                                                                                                                                                                                                                                                                                                                                                                                                                                                                                                                                                                                                                                                                                                                                                                                                                                                                                                                                                                                                                                              | 7/21 (33)                                     | 5/14 (36)            | 1/14 (7)     |
| HI-P                                                                                                                                                                                                                                                                                                                                                                                                                                                                                                                                                                                                                                                                                                                                                                                                                                                                                                                                                                                                                                                                                                                                                                                                                                                              | 4/13 (31)                                     | 2/8 (25)             | 2/12 (17)    |
| HI-N                                                                                                                                                                                                                                                                                                                                                                                                                                                                                                                                                                                                                                                                                                                                                                                                                                                                                                                                                                                                                                                                                                                                                                                                                                                              | 0/0                                           | 1/5 (20)             | 2/11 (18)    |
| <b>Marrow CR</b>                                                                                                                                                                                                                                                                                                                                                                                                                                                                                                                                                                                                                                                                                                                                                                                                                                                                                                                                                                                                                                                                                                                                                                                                                                                  | 0/0                                           | 1/3 (33)             | 3/9 (33)     |
| <b>RBC TI<sup>  </sup></b>                                                                                                                                                                                                                                                                                                                                                                                                                                                                                                                                                                                                                                                                                                                                                                                                                                                                                                                                                                                                                                                                                                                                                                                                                                        |                                               |                      |              |
| Sustained for 56 days                                                                                                                                                                                                                                                                                                                                                                                                                                                                                                                                                                                                                                                                                                                                                                                                                                                                                                                                                                                                                                                                                                                                                                                                                                             | 7/13 (54)                                     | 3/10 (30)            | 1/8 (13)     |
| <b>Platelet TI<sup>  </sup></b>                                                                                                                                                                                                                                                                                                                                                                                                                                                                                                                                                                                                                                                                                                                                                                                                                                                                                                                                                                                                                                                                                                                                                                                                                                   |                                               |                      |              |
| Sustained for 56 days                                                                                                                                                                                                                                                                                                                                                                                                                                                                                                                                                                                                                                                                                                                                                                                                                                                                                                                                                                                                                                                                                                                                                                                                                                             | 0/2                                           | 0/2                  | 0/2          |
| <p>IWG 2006 criteria<sup>28</sup></p> <p>*1 patient was not evaluable for IPSS-R score</p> <p>†1 patient had very low risk MDS per IPSS-R</p> <p>‡Patients are counted only once for Overall Response, but may be counted more than once in individual response categories. marrow CR (mCR) is not included in Overall Response</p> <p>§Subjects who had a CR are not counted for PR, any HI, or (mCR).</p> <p>  To be evaluated for RBC TI, patients must have been RBC transfusion-dependent at baseline and been on-study at least 56 days. RBC transfusion dependence at baseline was defined as receipt of ≥ 4 units of packed RBC within 56 days of the first dose of CC-486. To be evaluated for platelet TI, patients must have been platelet transfusion-dependent at baseline and been on-study at least 56 days. Platelet transfusion dependence at baseline was defined as receipt of ≥ 2 platelet transfusions within 56 days of the first dose of CC-486.</p> <p>CR = complete remission; PR = partial remission; HI = hematologic improvement; HI-E = hematologic improvement-erythroid; HI-P = hematologic improvement-platelet; HI-N = hematologic improvement-neutrophil; TI = transfusion independence; IWG = International Working Group.</p> |                                               |                      |              |

**Supplementary Table 5. Grade 3-4 hematologic adverse events (≥5%) by treatment cycles**

| Treatment Cycles                  | 300 mg QD CC-486: 14 days/cycle (n=28) |                 |                 |               | 300 mg QD CC-486: 21 days/cycle (n=27) |                 |                 |               |
|-----------------------------------|----------------------------------------|-----------------|-----------------|---------------|----------------------------------------|-----------------|-----------------|---------------|
|                                   | 1 – 2<br>(n=28)                        | 3 – 4<br>(n=27) | 5 – 6<br>(n=23) | 7 +<br>(n=17) | 1 – 2<br>(n=27)                        | 3 – 4<br>(n=19) | 5 – 6<br>(n=15) | 7 +<br>(n=12) |
| <b>Anemia, n (%)</b>              | 1 (4)                                  | 3 (11)          | 1 (4)           | 1 (6)         | 3 (11)                                 | 0               | 0               | 1 (8)         |
| <b>Neutropenia, n (%)</b>         | 1 (4)                                  | 0               | 1 (4)           | 1 (6)         | 5 (19)                                 | 2 (11)          | 2 (13)          | 2 (17)        |
| <b>Thrombocytopenia, n (%)</b>    | 2 (7)                                  | 1 (4)           | 1 (4)           | 0             | 2 (7)                                  | 0               | 0               | 3 (25)        |
| <b>Febrile neutropenia, n (%)</b> | 1 (4)                                  | 0               | 0               | 0             | 2 (7)                                  | 2 (11)          | 0               | 0             |

n = number of patients evaluable for safety in each 2-cycle period or who received 7 or more cycles.
